# Supplementary material for: Introducing “carborazine” as a novel heterocyclic aromatic species
Source: Royal Society of Chemistry journal article supplement (doi:10.1039/c4nj02089h), 2015-01-01
Supplement: c4nj02089h1.pdf [file c4nj02089h1.pdf]

## Introducing “carborazine” as a novel heterocyclic aromatic species

Amrish Kumar Srivastava and Neeraj Misra\*

This is supplementary material submitted to New Journal of Chemistry

Vibrational spectrum of carborazine (Frequency in  $\text{cm}^{-1}$ , Intensity in a.u.)

| Frequency | Intensity |
|-----------|-----------|
| 333.1137  | 10.7137   |
| 365.1717  | 0.8234    |
| 608.3296  | 73.8774   |
| 860.4568  | 60.3777   |
| 879.7261  | 3.8198    |
| 902.4997  | 2.4389    |
| 930.374   | 22.4256   |
| 964.5922  | 3.2394    |
| 1178.2877 | 40.4436   |
| 1330.2551 | 11.7221   |
| 1503.8589 | 91.0484   |
| 1517.6084 | 16.6591   |
| 2662.1762 | 278.2399  |
| 3202.5922 | 28.3156   |
| 3552.512  | 58.2137   |

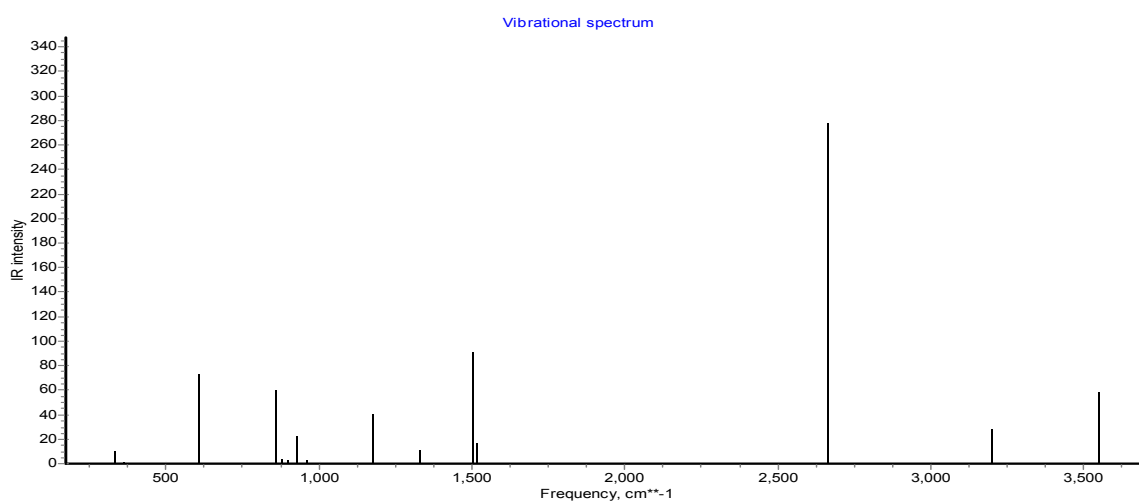

### Cartesian co-ordinates

| Atomic Number                                        | x            | y            | z            |
|------------------------------------------------------|--------------|--------------|--------------|
| A. Benzene (Figure 1)                                |              |              |              |
| 6                                                    | 0.000000000  | 1.407958000  | 0.000000000  |
| 6                                                    | 1.219328000  | 0.703979000  | 0.000000000  |
| 6                                                    | 1.219328000  | -0.703979000 | 0.000000000  |
| 6                                                    | 0.000000000  | -1.407958000 | 0.000000000  |
| 6                                                    | -1.219328000 | -0.703979000 | 0.000000000  |
| 6                                                    | -1.219328000 | 0.703979000  | 0.000000000  |
| 1                                                    | 0.000000000  | 2.502167000  | 0.000000000  |
| 1                                                    | 2.166940000  | 1.251084000  | 0.000000000  |
| 1                                                    | 2.166940000  | -1.251084000 | 0.000000000  |
| 1                                                    | 0.000000000  | -2.502167000 | 0.000000000  |
| 1                                                    | -2.166940000 | -1.251084000 | 0.000000000  |
| 1                                                    | -2.166940000 | 1.251084000  | 0.000000000  |
| B. Borazine (Figure 1)                               |              |              |              |
| 1                                                    | 0.000000000  | -2.665521000 | 0.000000000  |
| 1                                                    | 2.105816000  | -1.215794000 | 0.000000000  |
| 1                                                    | 2.308409000  | 1.332761000  | 0.000000000  |
| 1                                                    | 0.000000000  | 2.431587000  | 0.000000000  |
| 1                                                    | -2.308409000 | 1.332761000  | 0.000000000  |
| 1                                                    | -2.105816000 | -1.215794000 | 0.000000000  |
| 5                                                    | -1.267187000 | 0.731611000  | 0.000000000  |
| 5                                                    | 1.267187000  | 0.731611000  | 0.000000000  |
| 5                                                    | 0.000000000  | -1.463222000 | 0.000000000  |
| 7                                                    | 0.000000000  | 1.417628000  | 0.000000000  |
| 7                                                    | -1.227702000 | -0.708814000 | 0.000000000  |
| 7                                                    | 1.227702000  | -0.708814000 | 0.000000000  |
| C. Carborazine (Figure 1)                            |              |              |              |
| 1                                                    | 1.167539000  | -2.109956000 | 0.000000000  |
| 1                                                    | -1.103375000 | -2.287152000 | 0.000000000  |
| 1                                                    | -2.684973000 | 0.094173000  | 0.000000000  |
| 1                                                    | -1.167539000 | 2.109956000  | 0.000000000  |
| 1                                                    | 1.103375000  | 2.287152000  | 0.000000000  |
| 1                                                    | 2.684973000  | -0.094173000 | 0.000000000  |
| 5                                                    | -1.487741000 | 0.000370000  | 0.000000000  |
| 7                                                    | -0.685937000 | 1.210845000  | 0.000000000  |
| 6                                                    | -0.685937000 | -1.274769000 | 0.000000000  |
| 6                                                    | 0.685937000  | 1.274769000  | 0.000000000  |
| 7                                                    | 0.685937000  | -1.210845000 | 0.000000000  |
| 5                                                    | 1.487741000  | -0.000370000 | 0.000000000  |
| D. Carborazine isomer (Figure 2)                     |              |              |              |
| 1                                                    | -2.118375000 | -1.249158000 | 0.000000000  |
| 1                                                    | -2.288176000 | 1.323056000  | 0.000000000  |
| 1                                                    | 0.044592000  | 2.366017000  | 0.000000000  |
| 1                                                    | 2.103403000  | 1.329292000  | 0.000000000  |
| 1                                                    | 2.294659000  | -1.121848000 | 0.000000000  |
| 1                                                    | -0.057956000 | -2.715782000 | 0.000000000  |
| 7                                                    | -1.233692000 | -0.750229000 | 0.000000000  |
| 5                                                    | -0.005669000 | -1.512037000 | 0.000000000  |
| 5                                                    | -1.271891000 | 0.683639000  | 0.000000000  |
| 7                                                    | 0.000000000  | 1.353539000  | 0.000000000  |
| 6                                                    | 1.216333000  | 0.686007000  | 0.000000000  |
| 6                                                    | 1.291250000  | -0.688133000 | 0.000000000  |
| E. Phenol analog of carborazine (Figure 4, isomer 1) |              |              |              |
| 1                                                    | -1.918310000 | -1.891615000 | -0.000120000 |
| 1                                                    | -3.001705000 | 0.116270000  | -0.000200000 |
| 1                                                    | -1.439788000 | 2.523125000  | -0.000126000 |
| 1                                                    | 1.037088000  | 1.911597000  | 0.000143000  |
| 1                                                    | 0.550076000  | -2.473362000 | 0.000020000  |
| 5                                                    | -1.058406000 | 1.385239000  | 0.000033000  |

|                                                       |              |              |              |
|-------------------------------------------------------|--------------|--------------|--------------|
| 7                                                     | 0.375627000  | 1.131753000  | 0.000125000  |
| 6                                                     | -1.908043000 | 0.144293000  | -0.000104000 |
| 6                                                     | 0.969714000  | -0.093608000 | 0.000147000  |
| 7                                                     | -1.291583000 | -1.086687000 | 0.000013000  |
| 5                                                     | 0.130870000  | -1.346388000 | 0.000078000  |
| 8                                                     | 2.345118000  | -0.010602000 | -0.000263000 |
| 1                                                     | 2.691033000  | -0.915020000 | 0.000608000  |
| F. Phenol analog of carborazine (Figure 4, isomer 2)  |              |              |              |
| 1                                                     | 2.871374000  | 0.022358000  | 0.000179000  |
| 1                                                     | 1.921800000  | -2.058049000 | 0.000033000  |
| 1                                                     | -0.937724000 | -2.281951000 | -0.000079000 |
| 1                                                     | 1.813798000  | 2.322264000  | 0.000166000  |
| 5                                                     | -0.251309000 | -1.294468000 | -0.000130000 |
| 7                                                     | -0.916332000 | -0.003821000 | -0.000163000 |
| 6                                                     | 1.242907000  | -1.199189000 | -0.000006000 |
| 6                                                     | -0.336182000 | 1.224939000  | -0.000110000 |
| 7                                                     | 1.852107000  | 0.032228000  | 0.000073000  |
| 5                                                     | 1.168557000  | 1.310953000  | 0.000052000  |
| 1                                                     | -1.049232000 | 2.054173000  | -0.000011000 |
| 8                                                     | -2.326641000 | 0.049342000  | 0.000049000  |
| 1                                                     | -2.583910000 | -0.889310000 | 0.001043000  |
| G. Phenol analog of carborazine (Figure 4, isomer 3)  |              |              |              |
| 1                                                     | -0.829866000 | 2.044018000  | 0.000231000  |
| 1                                                     | 1.442236000  | 2.360328000  | 0.000043000  |
| 1                                                     | 3.161452000  | 0.072689000  | 0.000174000  |
| 5                                                     | 1.961014000  | 0.101347000  | 0.000125000  |
| 7                                                     | 1.228991000  | -1.153869000 | -0.000010000 |
| 6                                                     | 1.087197000  | 1.324692000  | -0.000147000 |
| 6                                                     | -0.136732000 | -1.310362000 | -0.000091000 |
| 7                                                     | -0.280769000 | 1.182823000  | 0.000006000  |
| 5                                                     | -1.008788000 | -0.072633000 | -0.000041000 |
| 1                                                     | -0.488302000 | -2.348415000 | 0.000100000  |
| 8                                                     | -2.412891000 | 0.035802000  | 0.000057000  |
| 1                                                     | -2.847784000 | -0.824877000 | -0.000047000 |
| 1                                                     | 1.763920000  | -2.022387000 | 0.000083000  |
| H. Aniline analog of carborazine (Figure 4, isomer 1) |              |              |              |
| 1                                                     | -1.944126000 | -1.885694000 | 0.015503000  |
| 1                                                     | -3.025507000 | 0.127110000  | 0.017760000  |
| 1                                                     | -1.448636000 | 2.525682000  | 0.003330000  |
| 1                                                     | 0.994007000  | 1.925570000  | -0.059929000 |
| 1                                                     | 0.508755000  | -2.474720000 | 0.008135000  |
| 5                                                     | -1.073113000 | 1.384697000  | 0.002861000  |
| 7                                                     | 0.358223000  | 1.126406000  | -0.014598000 |
| 6                                                     | -1.931552000 | 0.149697000  | 0.010762000  |
| 6                                                     | 0.969881000  | -0.102352000 | -0.006401000 |
| 7                                                     | -1.317527000 | -1.080850000 | 0.004294000  |
| 5                                                     | 0.106504000  | -1.340885000 | -0.001692000 |
| 7                                                     | 2.374512000  | -0.092379000 | -0.077049000 |
| 1                                                     | 2.832481000  | 0.614361000  | 0.497121000  |
| 1                                                     | 2.779640000  | -1.007685000 | 0.097547000  |
| I. Aniline analog of carborazine (Figure 4, isomer 2) |              |              |              |
| 1                                                     | 0.782289000  | 2.062432000  | -0.009477000 |
| 1                                                     | -1.468511000 | 2.358233000  | 0.000495000  |
| 1                                                     | -3.187383000 | 0.076077000  | 0.003118000  |
| 1                                                     | -1.784851000 | -2.021763000 | 0.002637000  |
| 5                                                     | -1.986446000 | 0.100224000  | 0.002106000  |
| 7                                                     | -1.253529000 | -1.151123000 | 0.001562000  |
| 6                                                     | -1.110957000 | 1.323029000  | 0.001185000  |
| 6                                                     | 0.113621000  | -1.304332000 | 0.002068000  |
| 7                                                     | 0.258296000  | 1.186641000  | -0.000974000 |
| 5                                                     | 0.998950000  | -0.072868000 | 0.000130000  |
| 1                                                     | 0.464346000  | -2.342646000 | 0.002932000  |

|                                                              |              |              |              |
|--------------------------------------------------------------|--------------|--------------|--------------|
| 7                                                            | 2.445725000  | -0.066679000 | -0.044221000 |
| 1                                                            | 2.993402000  | 0.756630000  | 0.172454000  |
| 1                                                            | 2.968757000  | -0.919800000 | 0.102566000  |
| J. Aniline analog of carborazine (Figure 4, isomer 3)        |              |              |              |
| 1                                                            | -2.895138000 | 0.008998000  | 0.000307000  |
| 1                                                            | -1.935637000 | -2.064322000 | -0.000137000 |
| 1                                                            | 0.902881000  | -2.287113000 | -0.000437000 |
| 5                                                            | 0.240593000  | -1.284639000 | -0.000268000 |
| 7                                                            | 0.922674000  | 0.000886000  | -0.000197000 |
| 6                                                            | -1.260251000 | -1.202083000 | -0.000115000 |
| 6                                                            | 0.306924000  | 1.223938000  | -0.000018000 |
| 7                                                            | -1.875405000 | 0.024062000  | 0.000188000  |
| 5                                                            | -1.197161000 | 1.307310000  | 0.000285000  |
| 1                                                            | 1.007788000  | 2.063440000  | -0.000226000 |
| 1                                                            | -1.851493000 | 2.313522000  | 0.000491000  |
| 7                                                            | 2.370796000  | 0.070872000  | -0.000354000 |
| 1                                                            | 2.673960000  | -0.471942000 | 0.813663000  |
| 1                                                            | 2.673987000  | -0.477804000 | -0.810408000 |
| K. Naphthalene analog of carborazine (Figure 5, structure 1) |              |              |              |
| 6                                                            | 0.000000000  | 1.326304000  | -1.425534000 |
| 6                                                            | 0.000000000  | 1.211130000  | 1.460256000  |
| 1                                                            | 0.000000000  | -1.432442000 | -2.517423000 |
| 1                                                            | 0.000000000  | 3.345356000  | -1.246378000 |
| 1                                                            | 0.000000000  | 1.432442000  | -2.517423000 |
| 6                                                            | 0.000000000  | -1.326304000 | -1.425534000 |
| 6                                                            | 0.000000000  | -1.211130000 | 1.460256000  |
| 1                                                            | 0.000000000  | 1.104066000  | 2.552108000  |
| 1                                                            | 0.000000000  | 3.606991000  | 1.282035000  |
| 1                                                            | 0.000000000  | -1.104066000 | 2.552108000  |
| 1                                                            | 0.000000000  | -3.606991000 | 1.282035000  |
| 1                                                            | 0.000000000  | -3.345356000 | -1.246378000 |
| 5                                                            | 0.000000000  | 2.528338000  | 0.752918000  |
| 5                                                            | 0.000000000  | 0.000000000  | -0.706475000 |
| 5                                                            | 0.000000000  | -2.528338000 | 0.752918000  |
| 7                                                            | 0.000000000  | 0.000000000  | 0.783767000  |
| 7                                                            | 0.000000000  | 2.476196000  | -0.713286000 |
| 7                                                            | 0.000000000  | -2.476196000 | -0.713286000 |
| L. Naphthalene analog of carborazine (Figure 5, structure 2) |              |              |              |
| 1                                                            | 0.000000000  | -1.424045000 | -2.648346000 |
| 1                                                            | 0.000000000  | 3.444111000  | -1.128937000 |
| 1                                                            | 0.000000000  | 1.424045000  | -2.648346000 |
| 1                                                            | 0.000000000  | 1.222852000  | 2.671784000  |
| 1                                                            | 0.000000000  | 3.544461000  | 1.148727000  |
| 1                                                            | 0.000000000  | -1.222852000 | 2.671784000  |
| 1                                                            | 0.000000000  | -3.544461000 | 1.148727000  |
| 1                                                            | 0.000000000  | -3.444111000 | -1.128937000 |
| 7                                                            | 0.000000000  | 0.000000000  | 0.706025000  |
| 7                                                            | 0.000000000  | 2.540558000  | -0.656521000 |
| 7                                                            | 0.000000000  | -2.540558000 | -0.656521000 |
| 6                                                            | 0.000000000  | 0.000000000  | -0.696711000 |
| 6                                                            | 0.000000000  | -2.554084000 | 0.681447000  |
| 6                                                            | 0.000000000  | 2.554084000  | 0.681447000  |
| 5                                                            | 0.000000000  | 1.300773000  | -1.453653000 |
| 5                                                            | 0.000000000  | 1.255589000  | 1.475037000  |
| 5                                                            | 0.000000000  | -1.300773000 | -1.453653000 |
| 5                                                            | 0.000000000  | -1.255589000 | 1.475037000  |
| M. Naphthalene analog of carborazine (Figure 5, structure 3) |              |              |              |
| 1                                                            | 0.000000000  | -1.135162000 | -2.440499000 |
| 1                                                            | 0.000000000  | 3.474712000  | -1.459046000 |
| 1                                                            | 0.000000000  | 1.135162000  | -2.440499000 |
| 1                                                            | 0.000000000  | 1.340693000  | 2.431161000  |
| 1                                                            | 0.000000000  | 3.373797000  | 1.379694000  |

|   |             |              |              |
|---|-------------|--------------|--------------|
| 1 | 0.000000000 | -1.340693000 | 2.431161000  |
| 1 | 0.000000000 | -3.373797000 | 1.379694000  |
| 1 | 0.000000000 | -3.474712000 | -1.459046000 |
| 6 | 0.000000000 | 0.000000000  | -0.787811000 |
| 6 | 0.000000000 | -2.491876000 | 0.736574000  |
| 6 | 0.000000000 | 2.491876000  | 0.736574000  |
| 5 | 0.000000000 | 0.000000000  | 0.778226000  |
| 5 | 0.000000000 | 2.519969000  | -0.731670000 |
| 5 | 0.000000000 | -2.519969000 | -0.731670000 |
| 7 | 0.000000000 | 1.280104000  | 1.413993000  |
| 7 | 0.000000000 | 1.168939000  | -1.418773000 |
| 7 | 0.000000000 | -1.168939000 | -1.418773000 |
| 7 | 0.000000000 | -1.280104000 | 1.413993000  |

---
